# The role of gamma interferon in acquired host resistance against *Staphylococcus aureus* infection in mice

Sanae Sasaki<sup>1</sup>, Yoh-Ichi Tagawa<sup>2</sup>, Yoichiro Iwakura<sup>3</sup> & Akio Nakane<sup>1</sup>

<sup>1</sup>Department of Bacteriology, Hirosaki University School of Medicine, Hirosaki, Aomori, Japan; <sup>2</sup>Institute of Experimental Animals, Shinshu University School of Medicine, Matsumoto, Nagano, Japan; and <sup>3</sup>Center for Experimental Medicine, Institute of Medical Science, University of Tokyo, Tokyo, Japan

**Correspondence:** Akio Nakane, Department of Bacteriology, Hirosaki University School of Medicine, Zaifu-cho 5, Hirosaki, Aomori 036-8562, Japan. Tel.: +81 172 395 032; fax: + 81 172 39 5034, e-mail: a27k03n0@cc.hirosaki-u.ac.jp

Received 4 July 2005; revised 20 September 2005; accepted 28 September 2005.  
First published online 26 January 2006.

doi:10.1111/j.1574-695X.2005.00037.x

Editor: Alex van Belkum

## Keywords

*Staphylococcus aureus*; acquired resistance; gamma interferon; antibody response.

## Abstract

We investigated the expression of an acquired host resistance against *Staphylococcus aureus* infection in mice. When C57BL/6 mice were immunized with viable *S. aureus* and challenged with *S. aureus* eight weeks later, the elimination of *S. aureus* from the spleen and liver was enhanced in the immunized mice compared with the non-immunized mice. When gamma interferon (IFN- $\gamma^{-/-}$ ) mice were immunized and challenged, the bacterial numbers in the organs of immunized mice were comparable to those in the nonimmunized mice, suggesting that IFN- $\gamma$  plays a critical role in an acquired host resistance against *S. aureus* infection. IFN- $\gamma^{-/-}$  mice produced the lower level of anti-*S. aureus* immunoglobulin M (IgM) and IgG2a antibodies compared with C57BL/6 mice. To elucidate the role of IFN- $\gamma$  produced during a challenge with *S. aureus*, a single injection of anti-IFN- $\gamma$  monoclonal antibody to mice was carried out 1 h before challenge. An acquired resistance against *S. aureus* infection was inhibited by injecting with anti-IFN- $\gamma$  monoclonal antibody. However, anti-IFN- $\gamma$  monoclonal antibody treatment failed to modulate anti-*S. aureus* IgM, IgG1 or IgG2a responses in these animals. These results demonstrated that IFN- $\gamma$  is required for an acquired resistance against *S. aureus* infection in mice. However, IFN- $\gamma$  induced during the challenge failed to affect the secondary antibody responses.

## Introduction

*Staphylococcus aureus* is a major cause of community- and hospital-acquired skin, respiratory, endovascular, soft tissue, bone and joint infections (Lowy, 1998). Multiple-drug-resistant *S. aureus* has increased as a result of the use of antibiotics (Sieradzki *et al.*, 1999). To develop new strategies of prevention and therapy for multiple-drug-resistant *S. aureus* infection, elucidation of the pathogenesis of staphylococcal disease should be required.

Antibodies are reportedly involved in host defense against *S. aureus* infection. Previous studies reported that antibodies to capsular polysaccharides from *S. aureus* protected the animals from *S. aureus* infection (Fattom *et al.*, 1996; Lee *et al.*, 1988, 1997), and that immunization of staphylococcal enterotoxin A provided protection against *S. aureus* sepsis (Nilsson *et al.*, 1999). In contrast, antibodies to protein A or teichoic acid derived from *S. aureus* were not protective in animal models of *S. aureus* infection (Greenberg D *et al.*, 1987; Greenberg *et al.*, 1989). Our recent studies demonstrated that antibodies to staphylococcal enterotoxin C and toxic shock syndrome toxin-1 were contributed to the

protection mice from multiple-drug-resistant *S. aureus* infection (Hu *et al.*, 2003, 2005).

In addition to humoral immunity, cell-mediated immunity is also required for resistance against *S. aureus* infection (Nakane *et al.*, 1995; Zhao *et al.*, 1995; Verdrengh & Tarkowski, 1997, 2000; Sasaki *et al.*, 2000; Gomez *et al.*, 2002). Staphylococci and their products are capable of strongly inducing various cytokines and are capable of activating cellular immunity. Cytokines including interferon- $\gamma$  (IFN- $\gamma$ ), interleukin-4 (IL-4), IL-10 and IL-18 reportedly regulate host resistance against *S. aureus* infection (Nakane *et al.*, 1995; Zhao *et al.*, 1995; Verdrengh & Tarkowski, 1997; Sasaki *et al.*, 2000; Gomez *et al.*, 2002). IFN- $\gamma$ -deficient mice, IFN- $\gamma$  receptor-deficient mice and IL-4-deficient C57BL/6 mice increased survival rates of *S. aureus* infection compared with that of wild-type mice, whereas the development of septicemia by *S. aureus* infection was inhibited in IL-18-deficient mice (Zhao *et al.*, 1995; Hultgren *et al.*, 1999; Wei *et al.*, 1999; Sasaki *et al.*, 2000). Alternatively, IL-4-deficient 129Sv mice displayed high mortality compared with wild-type mice, and IFN- $\gamma$  receptor-deficient mice and IL-18-deficient mice developed

significantly more severe septic arthritis as a result of *S. aureus* infection (Zhao *et al.*, 1995; Hultgren *et al.*, 1999; Wei *et al.*, 1999). These results indicated that cytokines have beneficial or harmful roles in *S. aureus* infection, depending on the stage of the disease, the state of the host immune response and the genetic background. Neutrophils and macrophages are reportedly principal effector cells in host resistance against *S. aureus* infection (Verdrengh & Tarkowski, 1997, 2000).

Our previous study indicated that *S. aureus* infection induced T-helper 2 (Th2) responses, and that IL-4 and IL-10 might play a protective role through the regulation of IFN- $\gamma$  in *S. aureus* infection and that IFN- $\gamma$ -deficient mice were resistant to *S. aureus* infection compared with wild-type mice (Sasaki *et al.*, 2000). Therefore we were interested in the role of IFN- $\gamma$  in an acquired host resistance against *S. aureus* infection in mice. In this study, we demonstrate that IFN- $\gamma$  is important for the expression of an acquired resistance against *S. aureus* infection.

## Materials and methods

### Animals

C57BL/6 mice and IFN- $\gamma$ -deficient mice (IFN- $\gamma^{-/-}$  mice) on a C57BL/6  $\times$  Sv129 background (Tagawa *et al.*, 1997), 8 to 10 weeks old, were used. C57BL/6 mice were purchased from SLC Japan (Hamamatsu, Shizuoka, Japan). The animals were maintained under the specific-pathogen-free condition in the Institute for Animal Experiment, Hirosaki University School of Medicine. This study was carried out in accordance with the Guidelines for Animal Experimentation of Hirosaki University.

### Bacteria

*Staphylococcus aureus* 834 and *Listeria monocytogenes* 1b 1684 were prepared as described previously (Nakane *et al.*, 1996; Sasaki *et al.*, 2000). *S. aureus* 834 is a clinical isolate and that produces toxic shock syndrome toxin-1 and staphylococcal enterotoxin C. In each experiment, *S. aureus* was cultured on tryptic soy agar (Difco Laboratories, Detroit, MI) for 24 h at 37 °C, inoculated into tryptic soy broth (Difco Laboratories) and incubated for another 15 h. The organisms were collected by centrifugation and resuspended in 0.01 M phosphate-buffered saline (PBS; pH 7.4). The concentration of resuspended cells was adjusted spectrophotometrically at 550 nm. *Listeria monocytogenes* grown in tryptic soy broth were dispensed and stored at -80 °C until use (Nakane *et al.*, 1996). Mice were infected with 10<sup>6</sup> or 10<sup>7</sup> CFU of *S. aureus* in PBS for immunization, and reinfected with 10<sup>7</sup> CFU of *S. aureus* in PBS 8 weeks later for challenge. In some experiments, *S. aureus* immunize mice were challenged with 5  $\times$  10<sup>4</sup> CFU of *L. monocytogenes*.

### Determination of the numbers of viable bacterial cells in the organs

The spleens and livers of infected animals were homogenized in PBS with a Dounce grinder (Asahi Glass Co., Tokyo, Japan). The numbers of viable *S. aureus* or *L. monocytogenes* were established by plating serial 10-fold dilutions of organ homogenates in PBS. Briefly, 0.1 mL of serially diluted organ homogenates were inoculated into tryptic soy agar plates and incubated at 37 °C. Colonies were routinely counted 18 to 24 h later.

### In vivo depletion of endogenous cytokines

A hybridoma cell line secreting monoclonal antibody (mAb) against mouse IFN- $\gamma$  [R4-6A2, rat immunoglobulin G1 (IgG1)] was used. mAb found in the ascites fluid was partially purified by (NH<sub>4</sub>)<sub>2</sub>SO<sub>4</sub> precipitation (Nakane *et al.*, 1995). The mice were given a single intravenous injection of 1 mg of anti-IFN- $\gamma$  mAb or normal rat globulin (NRG) as a control for the mAb 1 h before infection. NRG was prepared as described previously (Nakane *et al.*, 1995). All *in vivo* effects of mAb and NRG described were verified by the use of reagents tested by the *Limulus* amoebocyte lysate assay to contain <0.1 ng per injected dose.

### Cytokine assay

The IFN- $\gamma$  assay was carried out by a double-sandwich enzyme-linked immunosorbent assay (ELISA) as described previously (Nakane *et al.*, 1995). Purified rat antimouse IFN- $\gamma$  mAb produced by hybridoma R4-6A2 and rabbit antirecombinant mouse IFN- $\gamma$  sera were used for IFN- $\gamma$  ELISA. All ELISAs were run with recombinant mouse IFN- $\gamma$  produced and purified by Genentech Inc. (San Francisco, CA).

### Preparation of staphylococcal cell components

*Staphylococcus aureus* cellular protein and cell wall fraction were prepared as follows: *S. aureus* 834 grown in tryptic soy broth was washed three times with PBS and resuspended in nonpyrogenic double-distilled water to make a 20% cell suspension [wet w/v (weight in volume)]. The cells were sonically disrupted with a sonic oscillator (TAITEC Co., Tokyo, Japan; 150 W, 20 kHz) for 20 min by ice-chilling and were centrifuged at 14 500 g for 60 min at 4 °C. The supernatant fluid obtained was sterilized by filtration through a Millipore filter (Millipore, Billerica, MA; pore size 0.2  $\mu$ m). The precipitate by differential centrifugation was washed three times with nonpyrogenic double distilled water and autoclaved. All preparations were carried out under aseptic conditions. *S. aureus* cellular protein and cell wall fraction were stored at -80 °C.

### Quantitation of *Staphylococcus aureus*-specific antibodies

The levels of IgM, IgG1 and IgG2a to *S. aureus* in mouse sera were measured by ELISAs as described previously (Hu *et al.*, 2003). A 96-well microplate was coated with 250 ng of *S. aureus* cellular protein in PBS containing 2.5 µg protein mL<sup>-1</sup>. After blocking the plate with PBS containing 10% Blockace (Dainippon Pharmaceutical Co., Ltd., Tokyo, Japan), serum specimen diluted 1:100 with PBS containing 10% Blockace was added to each well. To detect the anti-*S. aureus* antibodies, horseradish peroxidase-conjugated with goat antimouse IgM, IgG1, or IgG2a antibody (Southern Biotechnology Associates Inc., Birmingham, AL) were used. Positive control sera were prepared from *S. aureus* infected mice that were boosted intraperitoneally with 0.5 mg of *S. aureus* cellular protein on days 28 and 35 postinfection. On day 42 postinfection, mice were sacrificed and pooled sera arbitrarily assigned *S. aureus*-specific IgM, IgG1 and IgG2a titers of 10 U mL<sup>-1</sup>, respectively, were included in each assay as a standard.

### Preparation of sera and organ extracts for cytokine assays

Mice were injected intravenously with 100 µg of *S. aureus* cell wall fraction and were sacrificed 2 or 4 h postinjection. The spleens and livers of animals were homogenized in RPMI 1640 medium containing 1% (w/v) 3-[(cholamidopropyl)-dimethyl-ammonio]-1-propanesulfate (CHAPS; Wako Pure Chemical Co., Osaka, Japan) as described previously (Sasaki *et al.*, 2000), and then clarified by centrifuging at 2000 g for 20 min. The organ extracts and sera were stored at -80 °C until cytokine assays were performed.

### Statistical evaluation of the data

Data were expressed as the median, together with the range, and the Mann-Whitney nonparametric test was employed to detect the differences among the groups. IFN-γ titers were expressed as mean ± standard deviation.

## Results

### Expression of an acquired host resistance against *Staphylococcus aureus* infection in C57BL/6 mice and IFN-γ<sup>-/-</sup> mice

To evaluate the expression of an acquired host resistance against *Staphylococcus aureus* infection, C57BL/6 mice were immunized with 10<sup>7</sup> CFU of *S. aureus*, and the mice were challenged with 10<sup>7</sup> CFU of *S. aureus* after 8 weeks of immunization, and the numbers of *S. aureus* in the spleens and livers were determined on day 3 of the challenge (Fig. 1a). The numbers of *S. aureus* in the spleens and livers were significantly lower in the immunized mice than those in the

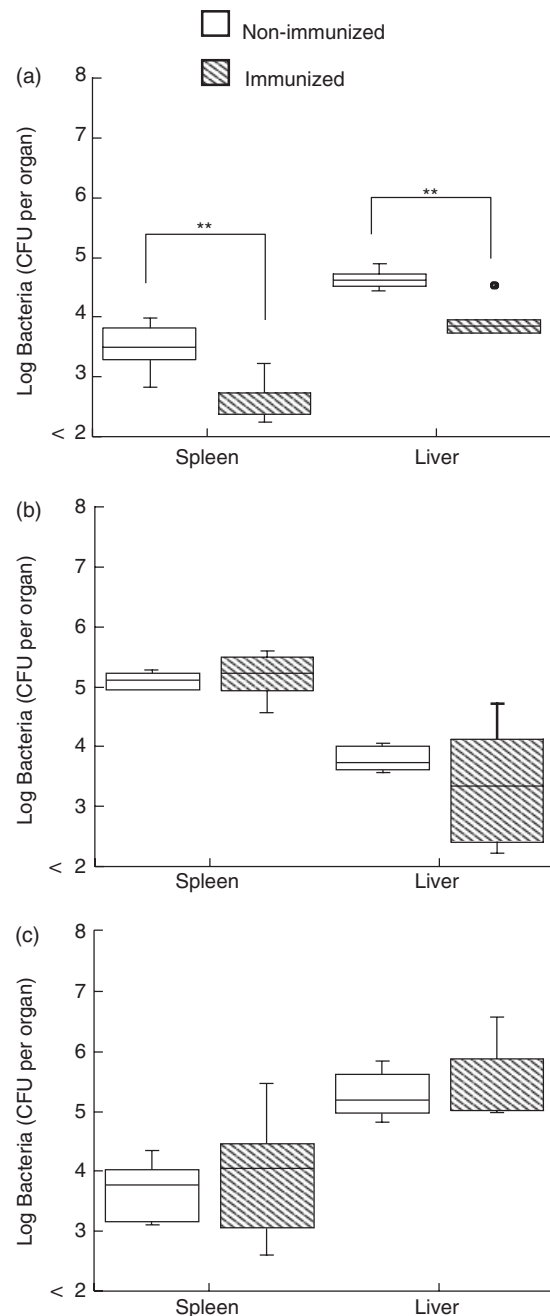

**Fig. 1.** Acquired host resistance against *Staphylococcus aureus* infection in C57BL/6 mice and gamma interferon (IFN-γ<sup>-/-</sup>) mice. C57BL/6 mice (a,b) or IFN-γ<sup>-/-</sup> mice (c) were immunized with 10<sup>7</sup> CFU of *S. aureus*. After 8 weeks of immunization, mice were challenged with 10<sup>7</sup> CFU of *S. aureus* (a,c), or challenged with 5 × 10<sup>4</sup> CFU of *Listeria monocytogenes* (b). Bacterial numbers in the spleens and livers were determined on day 3 of the challenge of *S. aureus* and on day 2 of challenge of *L. monocytogenes*. For nonimmunized controls, age-matched naive mice were challenged with the same doses of bacteria. Data are expressed as the median together with the range of a group of six mice from two independent experiments. A double asterisk indicates a significant difference from the value for nonimmunized control group ( $P < 0.01$ ).

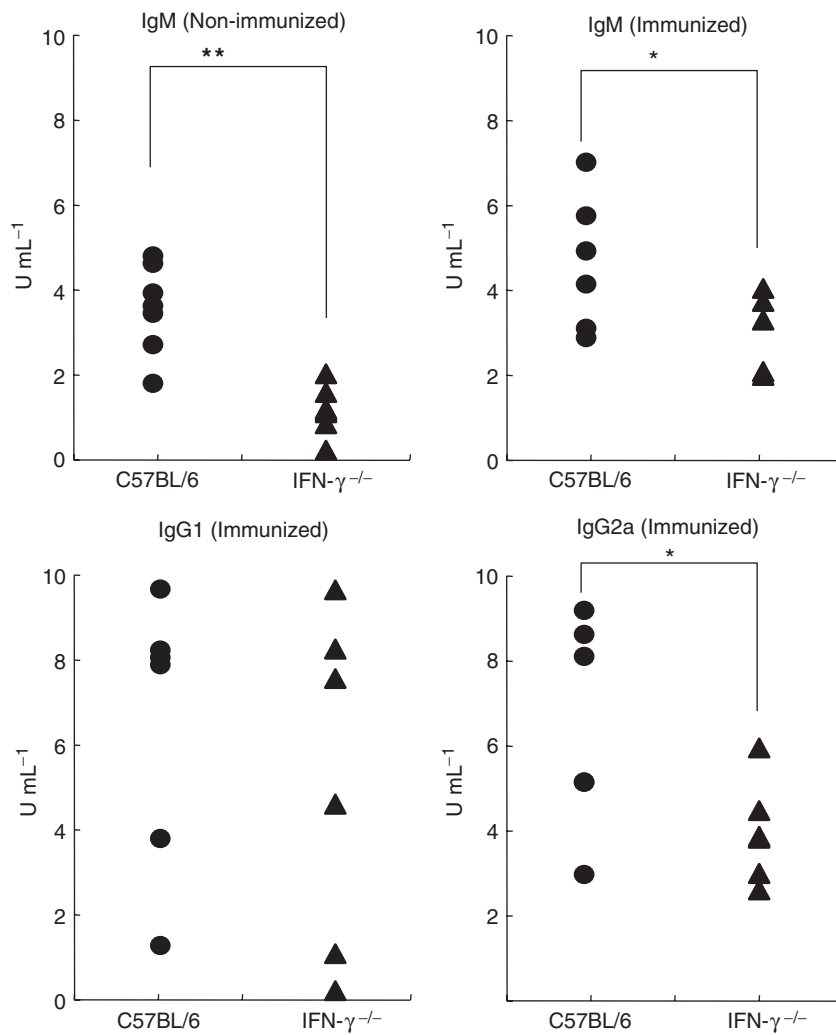

**Fig. 2.** Anti-*Staphylococcus aureus* antibody production in the sera obtained from *Staphylococcus aureus* infected gamma interferon ( $\text{IFN-}\gamma^{-/-}$ ) mice. Sera of immunized or nonimmunized C57BL/6 mice or  $\text{IFN-}\gamma^{-/-}$  mice were obtained on day 3 of *S. aureus* challenge. Anti-*S. aureus* immunoglobulin M (IgM), IgG1 and IgG2a in the sera were detected by enzyme-linked immunosorbent assays. Each point represents the value of individual animals of a group of six mice from two independent experiments. Single and double asterisks indicate significant differences from the value for nonimmunized control group at  $P < 0.05$  and at  $P < 0.01$ , respectively.

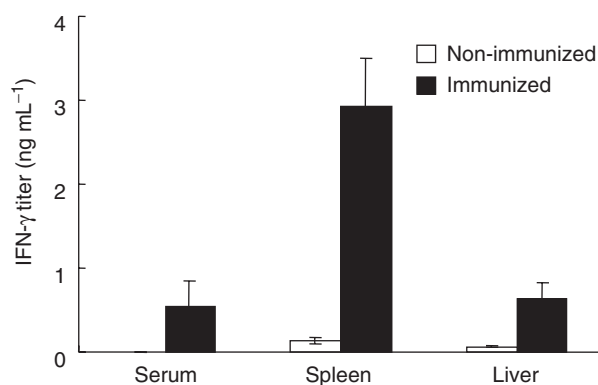

**Fig. 3.** Antigen-specific gamma interferon ( $\text{IFN-}\gamma$ ) induction in the sera and organs obtained from *Staphylococcus aureus*-immunized mice. The sera, spleens and livers of nonimmunized mice or immunized mice were obtained at 4 h after injection of *Staphylococcus aureus* cell wall fraction. Data are expressed as the mean and standard deviation for a group of four mice. The results were reproduced in three repeated experiments.

nonimmunized mice ( $P < 0.01$ ). To exclude the possibility that nonspecific activation of host resistance induced by the immunization may still remain 8 weeks later, we estimated whether the enhancement of host resistance against infection with an unrelated bacterium, *Listeria monocytogenes*, would be observed in *S. aureus* immunized mice. The *S. aureus* immunized C57BL/6 mice were infected with  $5 \times 10^4$  CFU of *Listeria monocytogenes* and the numbers of *Listeria monocytogenes* in the spleens and livers were determined on day 2 of infection (Fig 1b). The numbers of *L. monocytogenes* in the spleens and livers of immunized mice was comparable to those of nonimmunized mice. Moreover, to elucidate the role of  $\text{IFN-}\gamma$  in an acquired resistance against *S. aureus* infection,  $\text{IFN-}\gamma^{-/-}$  mice were immunized and challenged at the same schedule. The numbers of *S. aureus* in the spleens and livers of  $\text{IFN-}\gamma^{-/-}$  immunized mice after challenge were comparable to those in nonimmunized  $\text{IFN-}\gamma^{-/-}$  mice (Fig. 1c).

**Fig. 4.** Effect of *in vivo* administration of monoclonal antibodies (mAb) against gamma interferon (IFN- $\gamma$ ) before the secondary challenge on an acquired host resistance to *Staphylococcus aureus* infection. Mice were immunized with  $10^6$  CFU of *S. aureus*. After 8 weeks of immunization, mice were injected with normal rat globulin (NRG) or anti-IFN- $\gamma$  mAb 1 h before challenge with  $10^7$  CFU of *S. aureus*. For nonimmunized controls, age-matched naive mice were injected with NRG or anti-IFN- $\gamma$  mAb 1 h before challenge of *S. aureus*. Data are expressed as the median together with the range of a group of eight mice from two independent experiments. Single and double asterisks indicate significant differences of values between nonimmunized groups and immunized groups at  $P < 0.05$  and  $P < 0.01$ , respectively.

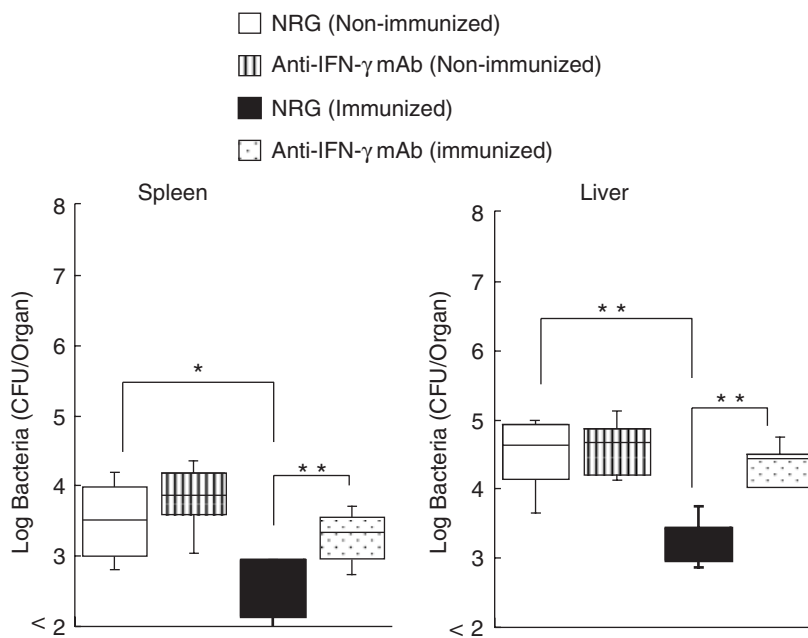

#### Anti-*Staphylococcus aureus* antibody production in the sera obtained from *Staphylococcus aureus* infected C57BL/6 mice and IFN- $\gamma^{-/-}$ mice

To estimate antibody responses to *S. aureus* in immunized mice, sera were obtained on day 3 of the challenge from nonimmunized and immunized groups of C57BL/6 mice and IFN- $\gamma^{-/-}$  mice, and anti-*S. aureus* IgM, IgG1, and IgG2a titers were determined (Fig. 2). In the nonimmunized mice, anti-*S. aureus* IgM production in IFN- $\gamma^{-/-}$  mice was significantly lower than that in C57BL/6 mice ( $P < 0.01$ ). Neither anti-*S. aureus* IgG1 nor IgG2a was detected in the nonimmunized mice (data not shown). In the immunized mice, IFN- $\gamma^{-/-}$  mice produced low levels of anti-*S. aureus* IgM and IgG2a compared with C57BL/6 mice ( $P < 0.05$ ), whereas anti-*S. aureus* IgG1 production in C57BL/6 mice was comparable to that of IFN- $\gamma^{-/-}$  mice.

#### Induction of IFN- $\gamma$ in the sera and organs obtained from *Staphylococcus aureus*-immunized mice

In our previous studies (Nakane *et al.*, 1995; Sasaki *et al.*, 2000), we demonstrated that IFN- $\gamma$  is induced in the spleens of *S. aureus* infected mice. Therefore, we verified the antigen-specific induction of IFN- $\gamma$  in the immunized mice. Mice were immunized with  $10^6$  CFU of *S. aureus*, and mice were injected with *S. aureus* cell wall fraction intravenously after 8 weeks of immunization. The production of IFN- $\gamma$  in the sera, spleens and livers of mice was determined 2 or 4 h later (Fig. 3). The marginal level of IFN- $\gamma$  production was

observed in the sera and organs of nonimmunized mice 4 h postinjection. In contrast, IFN- $\gamma$  was detected in the sera, spleens and livers of immunized mice at 4 h postinjection. No IFN- $\gamma$  was detected in the organs at 2 h.

#### Effect of *in vivo* administration of anti-IFN- $\gamma$ mAb before challenge on an acquired host resistance to *Staphylococcus aureus* infection

Finally, to determine the role of endogenous IFN- $\gamma$  induced during a challenge with *S. aureus* in the acquired resistance, the immunized mice were injected with anti-IFN- $\gamma$  mAb 1 h before challenging with  $10^7$  CFU of *S. aureus*, and the numbers of *S. aureus* in the spleens and livers were estimated 3 days later. No significant differences in the numbers of *S. aureus* were observed in the spleens and livers of nonimmunized mice between the NRG-injected group and the anti-IFN- $\gamma$  mAb-injected group (Fig. 4). The numbers of *S. aureus* in the spleens ( $P < 0.05$ ) and livers ( $P < 0.01$ ) of immunized mice were significantly lower than those of nonimmunized mice in the NRG-pretreated group. In the immunized mice, the numbers of *S. aureus* in the organs of NRG-pretreated mice were significantly lower than those of anti-IFN- $\gamma$  mAb-injected mice ( $P < 0.01$ ). Despite the lack of acquired host resistance in anti-IFN- $\gamma$  mAb-pretreated immunized mice, there was no significant difference in the production of anti-*S. aureus* IgM, IgG1, or IgG2a between NRG-pretreated and anti-IFN- $\gamma$  mAb-pretreated immunized mice (Fig. 5). Anti-*S. aureus* IgM titers in the nonimmunized mice were comparable between the anti-IFN- $\gamma$  mAb-injected group and the NRG-injected group.



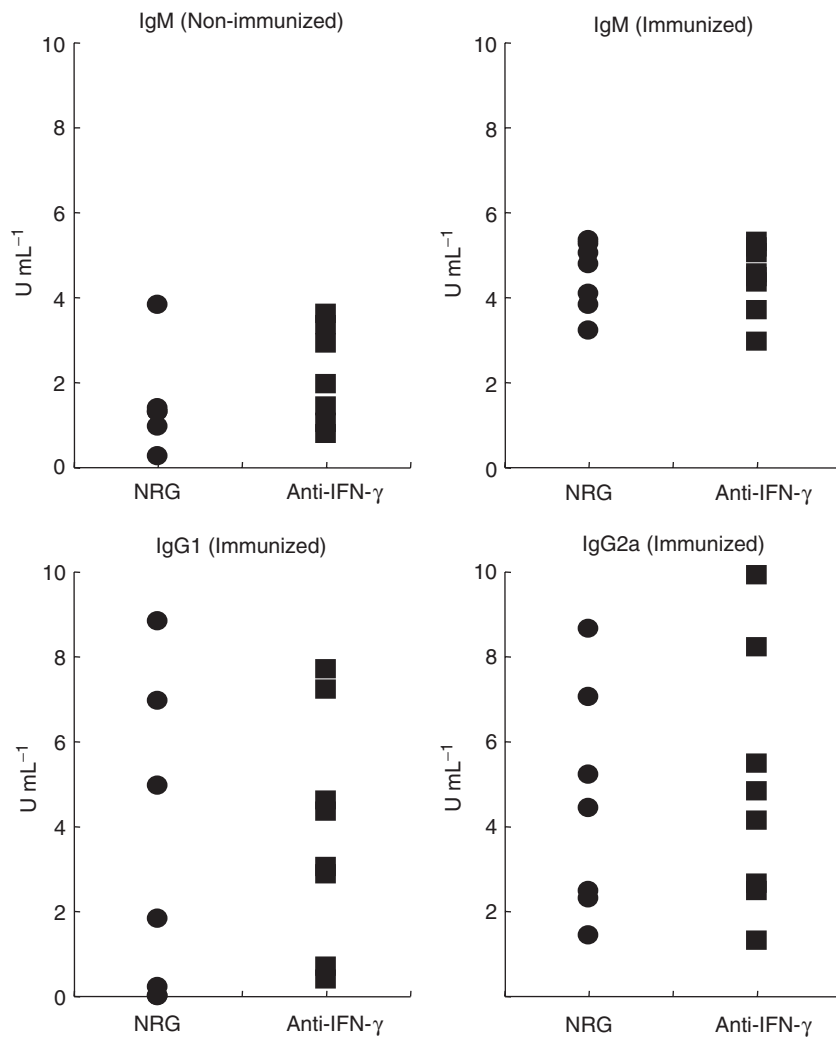

**Fig. 5.** Effect of *in vivo* administration of monoclonal antibodies (mAb) against gamma interferon (IFN- $\gamma$ ) before a secondary challenge on anti-*Staphylococcus aureus* antibody production. Sera of normal rat globulin (NRG)-pretreated or anti-IFN- $\gamma$  mAb-pretreated immunized mice were obtained on day 3 of *S. aureus* challenge. Anti-*S. aureus* immunoglobulin M (IgM), IgG1 and IgG2a in the sera were detected by enzyme-linked immunosorbent assays. For nonimmunized controls, age-matched naive mice were injected with NRG or anti-IFN- $\gamma$  mAb 1 h before challenge. Each point represents the value of individual animals of a group of eight mice from two independent experiments.

## Discussion

Our present study demonstrated that IFN- $\gamma$  is involved in an acquired resistance against *Staphylococcus aureus* infection, but that IFN- $\gamma$  might not be involved in secondary anti-*S. aureus* antibody responses.

When C57BL/6 mice were immunized with *S. aureus*, a significant decrease in the bacterial growth was observed in the spleens and livers of mice immunized with *S. aureus* (Figs 1a, 3 and 4). These results suggest that immunization with *S. aureus* can induce an acquired resistance against *S. aureus* infection. The challenge was carried out at 8 weeks after primary infection of *S. aureus*. To exclude the possibility that the enhanced resistance against *S. aureus* in the immunized mice is nonspecific, the immunized mice were challenged with an unrelated bacterium, *Listeria monocytogenes*, instead of *S. aureus*. However, *S. aureus* immunized mice showed no enhanced resistance to *L. monocytogenes* (Fig. 1b), suggesting that the enhanced

resistance in the immunized mice might be specific for *S. aureus*.

Our previous study (Sasaki *et al.*, 2000) demonstrated that IFN- $\gamma$  plays a detrimental role in host resistance against a primary infection with *S. aureus* because an increase in survival rates, a decrease in bacterial numbers in the organs and an amelioration of histological abnormalities in the organs were observed in IFN- $\gamma^{-/-}$  mice compared with those in IFN- $\gamma^{+/+}$  mice. Alternatively, Zhao & Tarkowski (1995) and Zhao *et al.* (1995) reported that IFN- $\gamma$  is involved in host resistance against primary *S. aureus* infection depending on the state of host response. In this study, endogenous IFN- $\gamma$  production was observed in the sera, spleens and livers at 4 h after injection of the cell wall fraction of *S. aureus* (Fig. 3). Moreover, the immunized effect on the bacterial elimination from the spleens and livers was diminished in IFN- $\gamma^{-/-}$  mice (Fig. 1c). These results suggested that IFN- $\gamma$  is involved in an acquired host resistance against *S. aureus* infection.

It is possible that IFN- $\gamma$  might be involved in both induction and expression of an acquired resistance against *S. aureus* infection. However, the role of IFN- $\gamma$  is indistinguishable either time point in IFN- $\gamma^{-/-}$  mice. Therefore, we addressed the implication of IFN- $\gamma$  induced by a challenge with *S. aureus* in an acquired resistance against *S. aureus* infection. A single injection of anti-IFN- $\gamma$  mAb to mice was carried out 1 h before a challenge with *S. aureus* to neutralize IFN- $\gamma$  induced after the challenge. The numbers of *S. aureus* in the spleen and liver of anti-IFN- $\gamma$  mAb-treated mice were significantly increased compared with those in NRG-treated mice (Fig. 4). The results indicated that an acquired host resistance against *S. aureus* infection was inhibited in mice that had been injected with anti-IFN- $\gamma$  mAb before challenge, suggesting that IFN- $\gamma$  induced during the challenge may be involved in the expression of an acquired resistance against *S. aureus* infection.

IFN- $\gamma$  is involved in the regulation of not only cell-mediated immunity but also of Ig class switch (Lin & Chen, 1993). IFN- $\gamma$  promotes B cells into IgG2a-secreting cell (Banchereau *et al.*, 1994a, b; Lin & Chen, 1993). The present result showed that the lower level of anti-*S. aureus* IgG2a production was observed in IFN- $\gamma^{-/-}$  mice compared with those in wild-type mice (Fig. 2). Moreover, anti-*S. aureus* IgM production in the *S. aureus* immunize group and the nonimmunized group of IFN- $\gamma^{-/-}$  mice was also reduced compared with that in C57BL/6 mice (Fig. 2). These results suggest that IFN- $\gamma$  is involved in anti-*S. aureus* IgM and IgG2a production. To investigate further that the temporary presence of IFN- $\gamma$  is required for anti-*S. aureus* Ig production in the secondary antibody responses, anti-*S. aureus* Ig responses were estimated in C57BL/6 mice in which anti-IFN- $\gamma$  mAb had been injected before the challenge (Fig. 5). No significant effect was observed when anti-IFN- $\gamma$  mAb had been injected before the challenge, suggesting that the presence of IFN- $\gamma$  is required for anti-*S. aureus* IgM and IgG2a production in the primary response.

Taken together, our present study demonstrated that IFN- $\gamma$  is required for the expression of an acquired resistance against *S. aureus* infection in mice. However, IFN- $\gamma$  induced during the challenge failed to affect the secondary Ig responses.

## Acknowledgement

This work was supported in part by a grant-in-aid for General Scientific Research (13770130) provided by the Japanese Ministry of Education, Science, Sports and Culture.

## References

Banchereau J, Bazan F, Blanchard D, Briere F, Galizzi JP, van Kooten C, Liu YJ, Rousset F & Saeland S (1994a) The CD40 antigen and its ligand. *Annu Rev Immunol* **12**: 881–922.

- Banchereau J, Briere F, Liu YJ & Rousset F (1994b) Molecular control of B lymphocyte growth and differentiation. *Stem Cells* **12**: 278–288.
- Fattom AI, Sarwar J, Ortiz A & Naso R (1996) A *Staphylococcus aureus* capsular polysaccharide (CP) vaccine and CP-specific antibodies protect mice against bacterial challenge. *Infect Immun* **64**: 1659–1665.
- Greenberg DP, Ward JI & Bayer AS (1987) Influence of *Staphylococcus aureus* antibody on experimental endocarditis in rabbits. *Infect Immun* **55**: 3030–3034.
- Greenberg DP, Bayer AS, Cheung AL & Ward JI (1989) Protective efficacy of protein A-specific antibody against bacteremic infection due to *Staphylococcus aureus* in an infant rat model. *Infect Immun* **57**: 1113–1118.
- Gomez MI, Sordelli DO, Buzzola FR & Garcia VE (2002) Induction of cell-mediated immunity to *Staphylococcus aureus* in the mouse gland by local immunization with a live attenuated mutant. *Infect Immun* **70**: 4254–4260.
- Hultgren O, Kopf M & Tarkowski A (1999) Outcome of *Staphylococcus aureus*-triggered sepsis and arthritis in IL-4-deficient mice depends on the genetic background of the host. *Eur J Immunol* **29**: 2400–2405.
- Hu D-L, Omoe K, Sasaki S, Sashinami H, Sakuraba H, Yokomizo Y, Shinagawa K & Nakane A (2003) Vaccination with nontoxic mutant toxic shock syndrome toxin protects against *Staphylococcus aureus* infection. *J Infect Dis* **188**: 743–752.
- Hu D-L, Cui J-C, Omoe K, Sashinami H, Yokomizo Y, Shinagawa K & Nakane A (2005) A mutant of staphylococcal enterotoxin C devoid of bacterial superantigenic activity elicits a Th2 immune response for protection against *Staphylococcus aureus* infection. *Infect Immun* **73**: 174–180.
- Lee JC, Perez NE, Hopkins CA & Pier GB (1988) Purified capsular polysaccharide-induced immunity to *Staphylococcus aureus* infection. *J Infect Dis* **157**: 723–730.
- Lee JC, Park JS, Shepherd SE, Carey V & Fattom A (1997) Protective efficacy of antibodies to the *Staphylococcus aureus* type 5 capsular polysaccharide in a modified model of endocarditis in rats. *Infect Immun* **65**: 4146–4151.
- Lin MS & Chen YW (1993) B cell differentiation. II. Isotype potential of a single B cell. *Cell Immunol* **150**: 343–352.
- Lowy FD (1998) *Staphylococcus aureus* infections. *N Engl J Med* **339**: 520–532.
- Nakane A, Okamoto M, Asano M, Kohanawa M & Minagawa T (1995) Endogenous gamma interferon, tumor necrosis factor, and interleukin-6 in *Staphylococcus aureus* infection in mice. *Infect Immun* **63**: 1165–1172.
- Nakane A, Nishikawa S, Sasaki S, Miura T, Asano M, Kohanawa K, Ishiwata K & Minagawa T (1996) Endogenous interleukin-4, but not interleukin-10, is involved in suppression of host resistance against *Listeria monocytogenes* infection in gamma interferon-depleted mice. *Infect Immun* **64**: 1252–1258.
- Nilsson IM, Verdrengh M, Ulrich RG, Bavari S & Tarkowski A (1999) Protection against *Staphylococcus aureus* sepsis by vaccination with recombinant staphylococcal enterotoxin A devoid of superantigenicity. *J Infect Dis* **180**: 1370–1373.

- Sasaki S, Nishikawa S, Miura T, Mizuki M, Yamada K, Madarame Y, Tagawa Y, Iwakura Y & Nakane A (2000) Interleukin-4 and interleukin-10 are involved in host resistance to *Staphylococcus aureus* infection through regulation of gamma interferon. *Infect Immun* **68**: 2424–2430.
- Sieradzki K, Roberts RB, Haber SW & Tomasz A (1999) The development of vancomycin resistance in a patient with methicillin-resistant *Staphylococcus aureus* infection. *N Engl J Med* **340**: 517–523.
- Tagawa Y, Sekikawa K & Iwakura Y (1997) Suppression of concanavalin A-induced hepatitis in IFN- $\gamma^{-/-}$  mice, but not in TNF- $\alpha^{-/-}$  mice: role for IFN- $\gamma$  in activating apoptosis of hepatocytes. *J Immunol* **159**: 1418–1428.
- Verdrengh M & Tarkowski A (1997) Role of neutrophils in experimental septicemia and septic arthritis induced by *Staphylococcus aureus*. *Infect Immun* **65**: 2517–2521.
- Verdrengh M & Tarkowski A (2000) Role of macrophage in *Staphylococcus aureus*-induced arthritis and sepsis. *Arth Rheum* **43**: 2276–2282.
- Wei XQ, Leung BP, Niedbala W, Piedrafita D, Feng GJ, Sweet M, Dobbie L, Smith AJ & Liew FY (1999) Altered immune responses and susceptibility to *Leishmania major* and *Staphylococcus aureus* infection in IL-18-deficient mice. *J Immunol* **163**: 2821–2828.
- Zhao P, Miller G & Seder RA (1995) Impact of interferon-gamma receptor deficiency on experimental *Staphylococcus aureus* septicemia and arthritis. *J Immunol* **155**: 5736–5742.
- Zhao YX & Tarkowski A (1995) Impact of interferon-gamma receptor deficiency on experimental *Staphylococcus aureus* septicemia and arthritis. *J Immunol* **155**: 5736–5742.
